# Supplementary material
Source: publisher site journal article supplement (https://www.dovepress.com/article/249733)

**Supporting information**

**Supplemental File 1 and Supplemental File 5.** The raw data in CAOV3 and OVCAR3 cell line. This table include the raw data about the expression of candidate HKGs in CAOV3 and OVCAR3 cells under hypoxia environment exposure;

**Supplemental File 2 and Supplemental File 6.** The analysis in CAOV3 and OVCAR3 cell line. The results of geNorm and NormFinder according to the raw data in CAOV3 and OVCAR3 cells.

**Supplemental File 3 and Supplemental File 7**. The average expression stability value (M) was calculated by geNorm for each gene in CAOV3 and OVCAR3 cells cultured under normoxia and hypoxia.

**Supplemental File 4 and Supplemental File 8.** Pairwise variation (V) between the normalization factors (Vn and Vn + 1) was used to determine the optimal number of reference genes for normalization

**Supplemental File 9.** The Raw data utilized in this manuscript.This table was the raw data used in this manuscript.

**Supplemental File1:** Cq value of the eight candidate reference genes in CAOV3 cells after exposure to hypoxia

|  | GAPDH | β-actin | 18S RNA | TUBB | PPIA | RPL13A | TBP | SDHA |
| --- | --- | --- | --- | --- | --- | --- | --- | --- |
| Control | 23.34 | 20.25 | 20.07 | 21.06 | 21.47 | 18.79 | 24.17 | 25.73 |
| 23.50 | 20.46 | 20.06 | 20.46 | 22.33 | 18.91 | 23.96 | 26.17 |
| 23.31 | 20.46 | 20.23 | 20.48 | 21.83 | 18.89 | 24.52 | 26.01 |
| 23.34 | 20.37 | 20.07 | 20.86 | 22.67 | 18.98 | 24.39 | 25.41 |
| HY 24H | 22.85 | 20.84 | 19.78 | 21.17 | 21.36 | 18.39 | 23.50 | 25.67 |
| 23.03 | 21.89 | 20.48 | 21.90 | 21.61 | 18.62 | 25.23 | 25.84 |
| 22.68 | 20.88 | 20.36 | 20.71 | 22.06 | 18.77 | 24.65 | 26.18 |
| 22.81 | 21.68 | 20.66 | 21.86 | 21.94 | 18.64 | 25.60 | 26.57 |

**Supplemental File2:** The results of geNorm and NormFinder according to the raw data in CAOV3

| **geNorm** | GAPDH | β-actin | 18S RNA | TUBB | PPIA | RPL13A | TBP | SDHA |
| --- | --- | --- | --- | --- | --- | --- | --- | --- |
| Control | 2.33E+01 | 2.03E+01 | 2.01E+01 | 2.11E+01 | 2.15E+01 | 1.88E+01 | 2.42E+01 | 2.57E+01 |
| Control | 2.35E+01 | 2.05E+01 | 2.01E+01 | 2.05E+01 | 2.23E+01 | 1.89E+01 | 2.40E+01 | 2.62E+01 |
| Control | 2.33E+01 | 2.05E+01 | 2.02E+01 | 2.05E+01 | 2.18E+01 | 1.89E+01 | 2.45E+01 | 2.60E+01 |
| Control | 2.33E+01 | 2.04E+01 | 2.01E+01 | 2.09E+01 | 2.27E+01 | 1.90E+01 | 2.44E+01 | 2.54E+01 |
| HY 24H | 2.29E+01 | 2.08E+01 | 1.98E+01 | 2.12E+01 | 2.14E+01 | 1.84E+01 | 2.35E+01 | 2.57E+01 |
| HY 24H | 2.30E+01 | 2.19E+01 | 2.05E+01 | 2.19E+01 | 2.16E+01 | 1.86E+01 | 2.52E+01 | 2.58E+01 |
| HY 24H | 2.27E+01 | 2.09E+01 | 2.04E+01 | 2.07E+01 | 2.21E+01 | 1.88E+01 | 2.47E+01 | 2.62E+01 |
| HY 24H | 2.28E+01 | 2.17E+01 | 2.07E+01 | 2.19E+01 | 2.19E+01 | 1.86E+01 | 2.56E+01 | 2.66E+01 |
|  |  |  |  |  |  |  |  |  |
| **M < 1.5** | **0.038** | **0.041** | **0.027** | **0.041** | **0.040** | **0.032** | **0.037** | **0.032** |

| **NormFinder** | **Gene name** | **Stability value** |  | **Best gene** | 18S RNA |
| --- | --- | --- | --- | --- | --- |
|  | GAPDH | 0.450 |  | **Stability value** | 0.071 |
| β-actin | 0.464 |  |  |  |
| 18S RNA | 0.071 |  | **Best combination of two genes** | GAPDH and β-actin |
| TUBB | 0.456 |  | **Stability value for best combination of two genes** | 0.110 |
| PPIA | 0.459 |  |  |  |
| RPL13A | 0.326 |  |  |  |
| TBP | 0.393 |  |  |  |
| SDHA | 0.249 |  |  |  |

**Supplemental File3:** The average expression stability value (M) was calculated by geNorm for each gene in CAOV3 cells cultured under normoxia and hypoxia


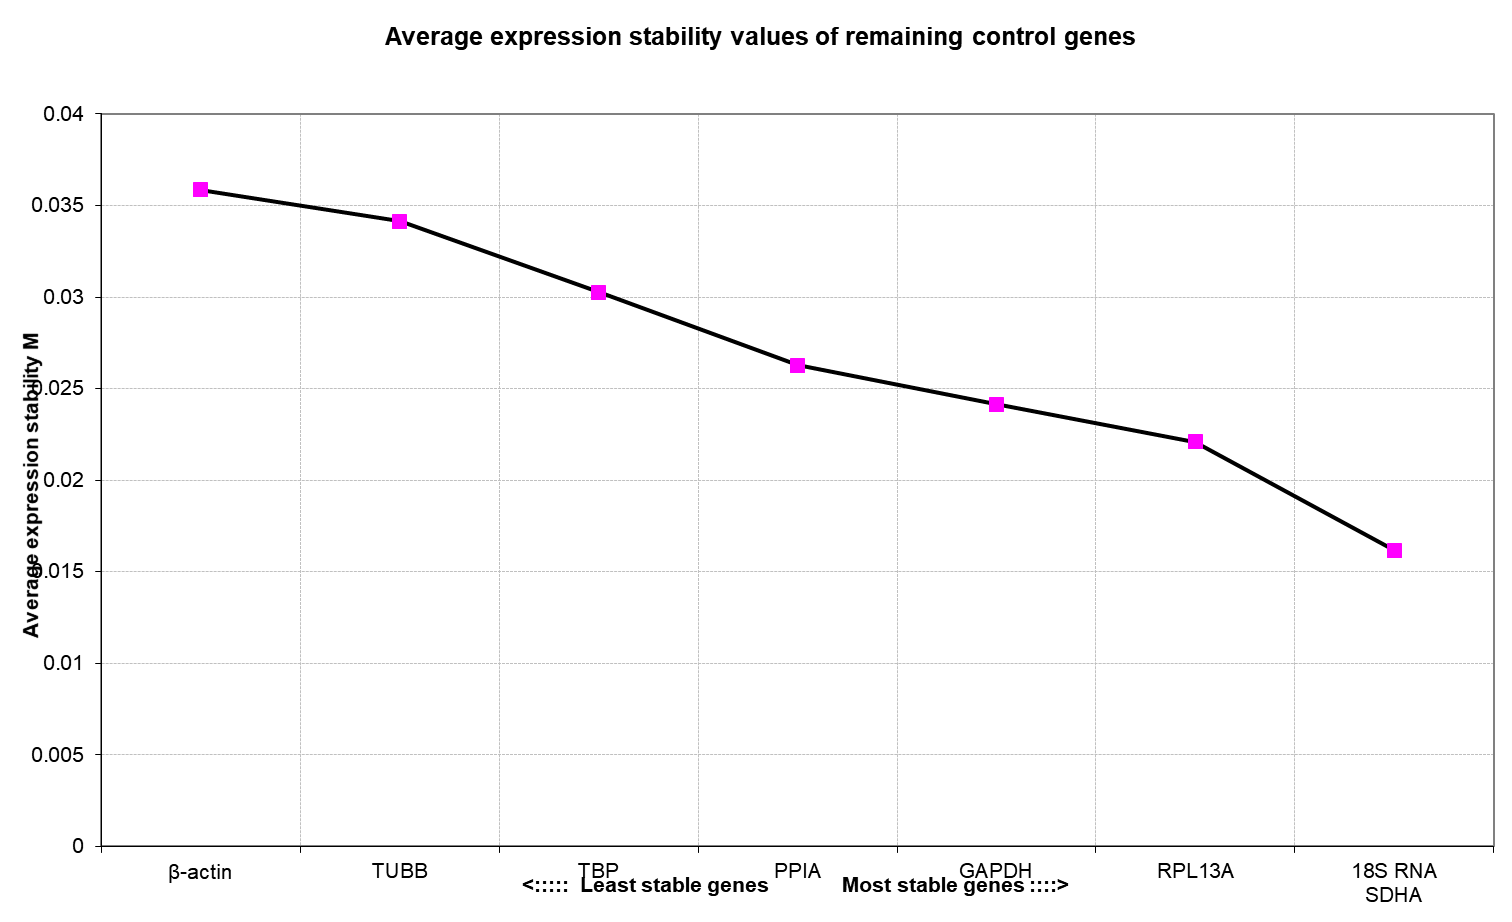


**Supplemental File4:** Pairwise variation (V) between the normalization factors (Vn and Vn + 1) was used to determine the optimal number of reference genes for normalization in CAOV3


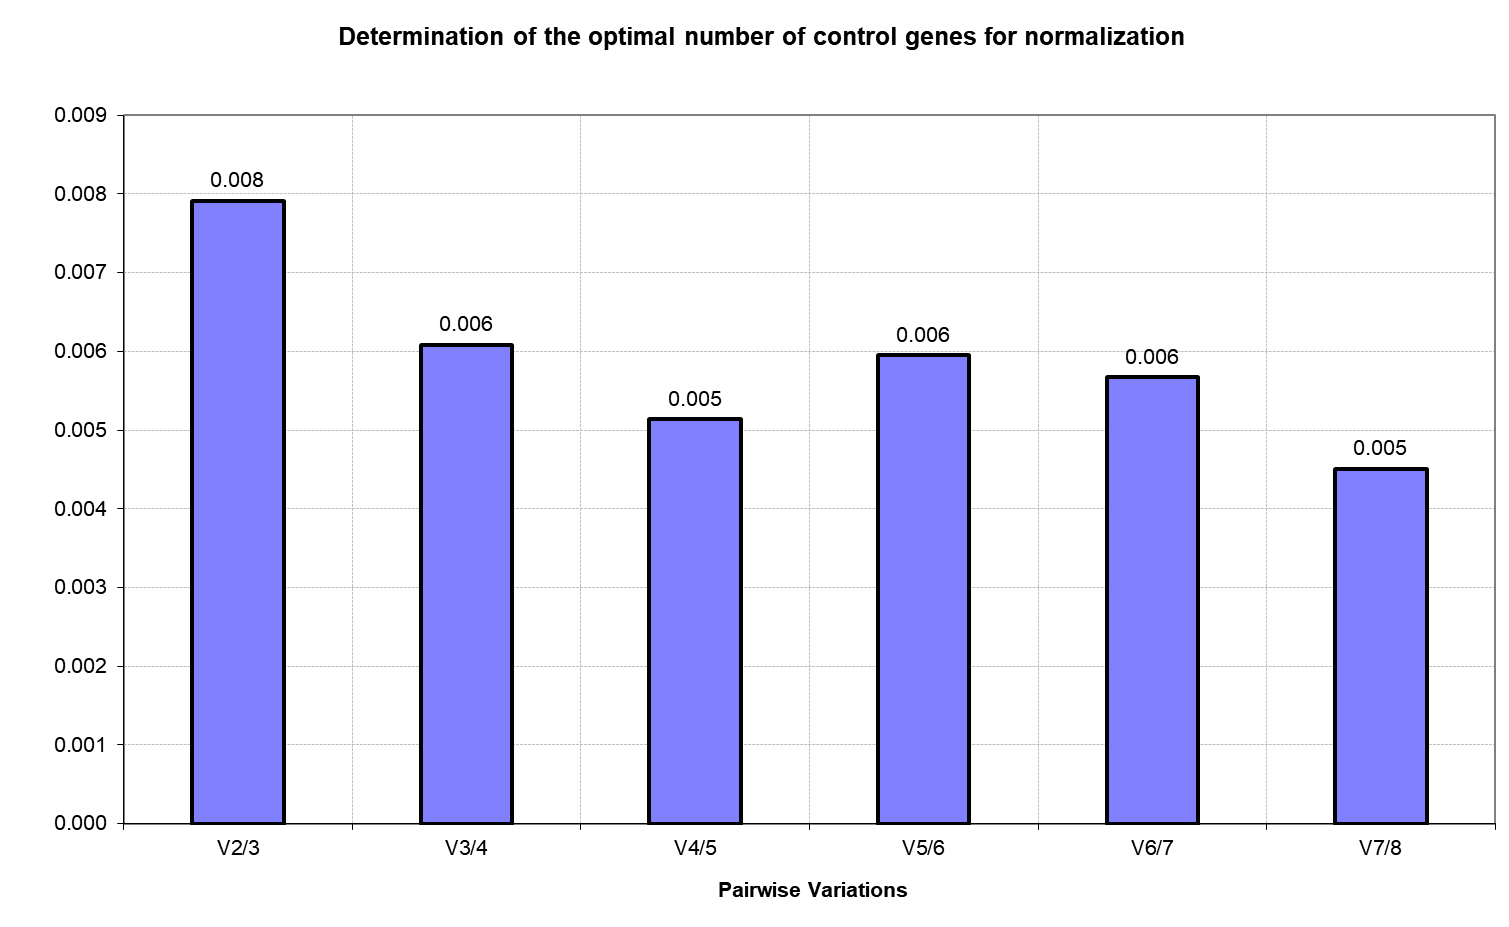


**Supplemental File5:** Cq value of the eight candidate reference genes in OVCAR3 cells after exposure to hypoxia

|  | GAPDH | β-actin | 18S RNA | TUBB | PPIA | RPL13A | TBP | SDHA |
| --- | --- | --- | --- | --- | --- | --- | --- | --- |
| Control | 23.96 | 20.74 | 20.72 | 21.29 | 21.40 | 18.90 | 23.79 | 26.28 |
| 23.45 | 19.96 | 20.98 | 20.97 | 22.80 | 19.24 | 24.31 | 26.24 |
| 23.88 | 19.93 | 19.97 | 20.83 | 21.61 | 19.34 | 24.46 | 26.47 |
| 23.39 | 19.83 | 20.82 | 21.35 | 23.08 | 18.80 | 25.10 | 25.87 |
| HY 24H | 22.62 | 20.61 | 20.08 | 22.11 | 22.23 | 18.30 | 23.37 | 25.86 |
| 22.93 | 21.70 | 20.80 | 22.04 | 21.49 | 19.47 | 25.78 | 25.55 |
| 23.18 | 21.63 | 20.17 | 20.73 | 22.66 | 19.24 | 25.19 | 26.66 |
| 23.22 | 21.22 | 21.27 | 21.81 | 21.71 | 18.67 | 25.55 | 27.40 |

**Supplemental File6:** The results of geNorm and NormFinder according to the raw data in OVCAR3

| **geNorm** | GAPDH | β-actin | 18S RNA | TUBB | PPIA | RPL13A | TBP | SDHA |
| --- | --- | --- | --- | --- | --- | --- | --- | --- |
| Control | 2.40E+01 | 2.07E+01 | 2.07E+01 | 2.13E+01 | 2.14E+01 | 1.89E+01 | 2.38E+01 | 2.63E+01 |
| Control | 2.35E+01 | 2.00E+01 | 2.10E+01 | 2.10E+01 | 2.28E+01 | 1.92E+01 | 2.43E+01 | 2.62E+01 |
| Control | 2.39E+01 | 1.99E+01 | 2.00E+01 | 2.08E+01 | 2.16E+01 | 1.93E+01 | 2.45E+01 | 2.65E+01 |
| Control | 2.34E+01 | 1.98E+01 | 2.08E+01 | 2.14E+01 | 2.31E+01 | 1.88E+01 | 2.51E+01 | 2.59E+01 |
| HY 24H | 2.26E+01 | 2.06E+01 | 2.01E+01 | 2.21E+01 | 2.22E+01 | 1.83E+01 | 2.34E+01 | 2.59E+01 |
| HY 24H | 2.29E+01 | 2.17E+01 | 2.08E+01 | 2.20E+01 | 2.15E+01 | 1.95E+01 | 2.58E+01 | 2.56E+01 |
| HY 24H | 2.32E+01 | 2.16E+01 | 2.02E+01 | 2.07E+01 | 2.27E+01 | 1.92E+01 | 2.52E+01 | 2.67E+01 |
| HY 24H | 2.32E+01 | 2.12E+01 | 2.13E+01 | 2.18E+01 | 2.17E+01 | 1.87E+01 | 2.56E+01 | 2.74E+01 |
|  |  |  |  |  |  |  |  |  |
| **M < 1.5** | **0.051** | **0.061** | **0.047** | **0.056** | **0.062** | **0.048** | **0.055** | **0.049** |

| **NormFinder** | **Gene name** | **Stability value** |  | **Best gene** | 18S RNA |
| --- | --- | --- | --- | --- | --- |
|  | 18S RNA | 0.319 |  | **Stability value** | 0.319 |
| SDHA | 0.348 |  |  |  |
| RPL13A | 0.356 |  | **Best combination of two genes** | GAPDH and β-actin |
| TUBB | 0.429 |  | **Stability value for best combination of two genes** | 0.167 |
| TBP | 0.504 |  |  |  |
| PPIA | 0.535 |  |  |  |
| GAPDH | 0.536 |  |  |  |
| β-actin | 0.603 |  |  |  |

**Supplemental File7:** The average expression stability value (M) was calculated by geNorm for each gene in OVCAR3 cells cultured under normoxia and hypoxia


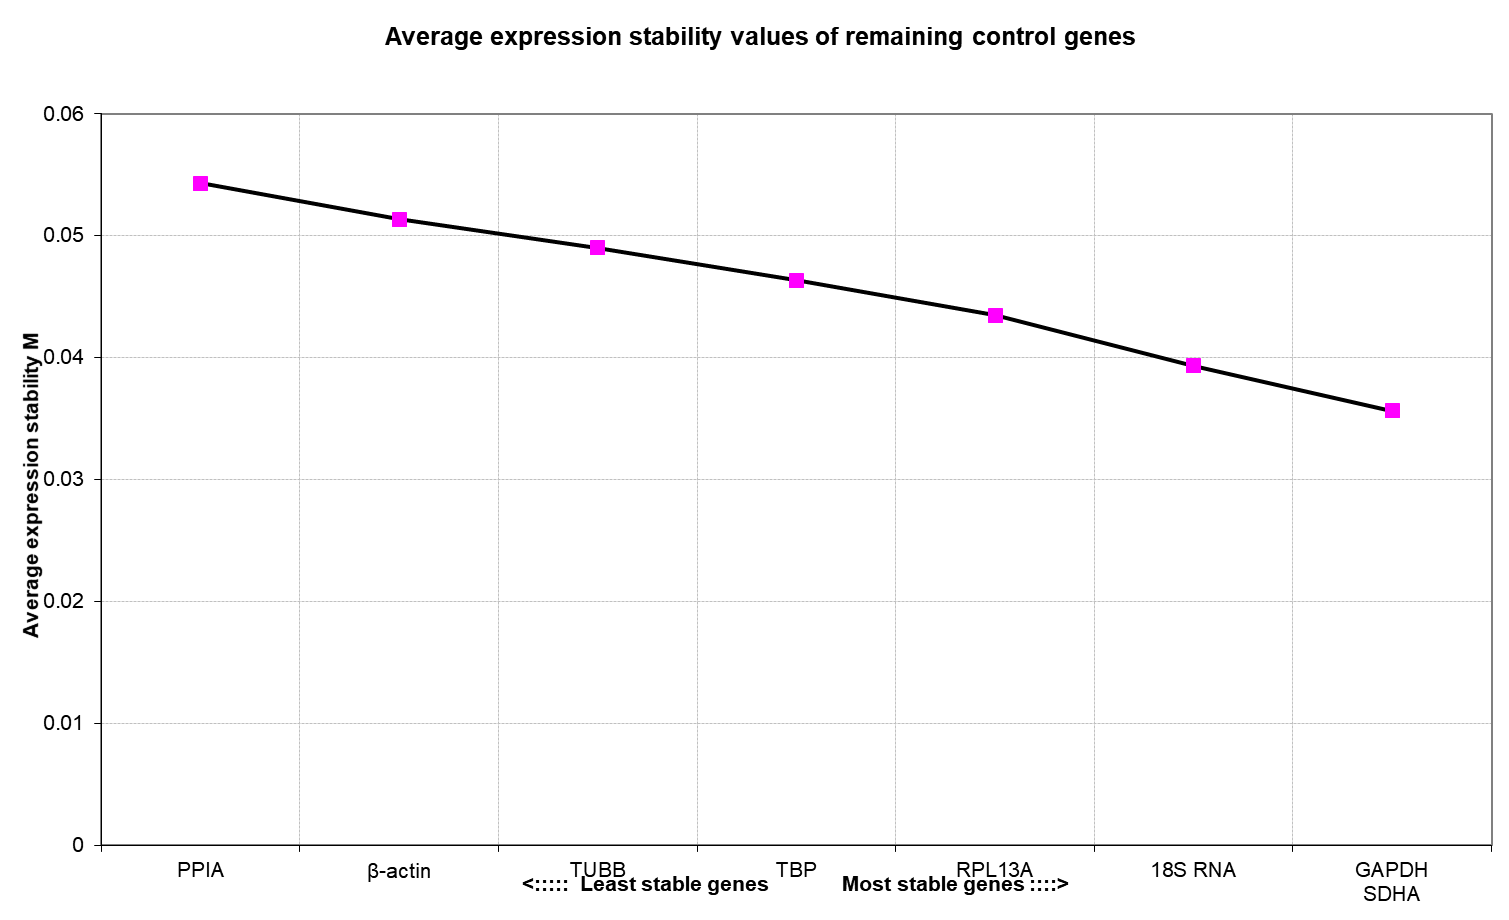


**Supplemental File8:** Pairwise variation (V) between the normalization factors (Vn and Vn + 1) was used to determine the optimal number of reference genes for normalization in OVCAR3


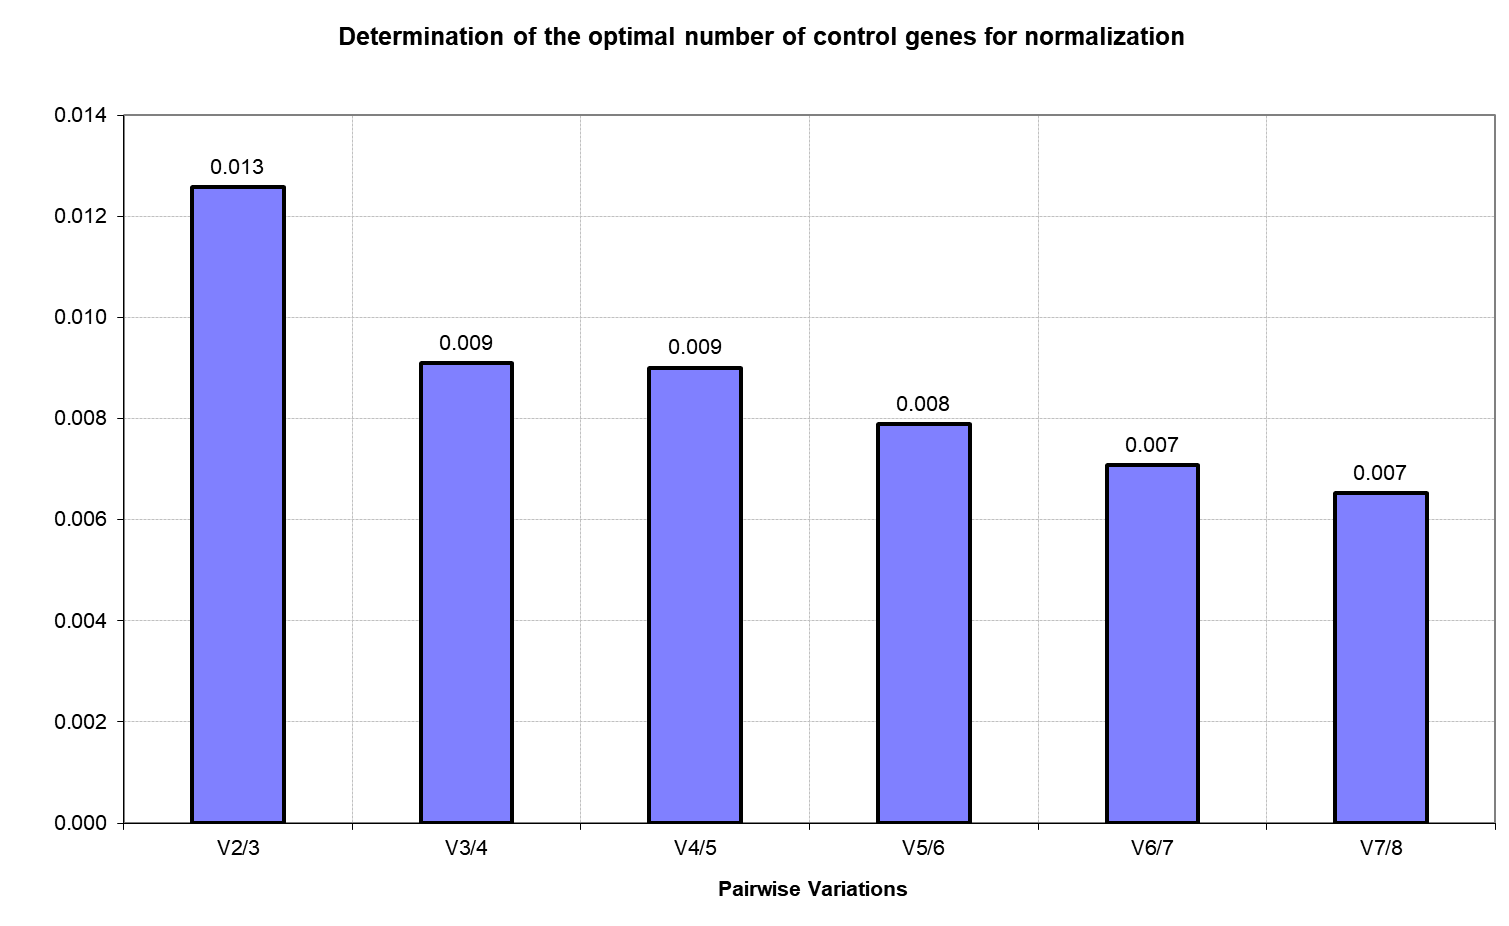


**Supplemental File9:** The Raw data utilized in this manuscript.

|  | GAPDH | β-actin | 18S RNA | TUBB | PPIA | RPL13A | TBP | SDHA |
| --- | --- | --- | --- | --- | --- | --- | --- | --- |
| Control | 23.82 | 21.01 | 23.29 | 21.38 | 16.73 | 18.93 | 24.77 | 26.44 |
| 23.64 | 21.10 | 23.37 | 21.36 | 17.02 | 18.59 | 24.64 | 26.07 |
| 23.37 | 21.00 | 23.15 | 21.32 | 16.64 | 18.74 | 24.24 | 26.17 |
| 23.46 | 20.82 | 23.32 | 21.21 | 16.72 | 18.48 | 24.45 | 26.03 |
| HY 24H | 23.84 | 22.13 | 23.95 | 22.38 | 17.18 | 19.16 | 25.08 | 26.39 |
| 24.02 | 21.87 | 23.91 | 22.14 | 17.57 | 19.14 | 25.48 | 26.36 |
| 23.96 | 21.91 | 23.93 | 22.28 | 17.26 | 19.34 | 25.13 | 26.55 |
| 24.06 | 22.03 | 24.00 | 22.08 | 17.47 | 19.26 | 25.75 | 26.51 |

**Supplemental File10:** the details of SKOV-3 cells


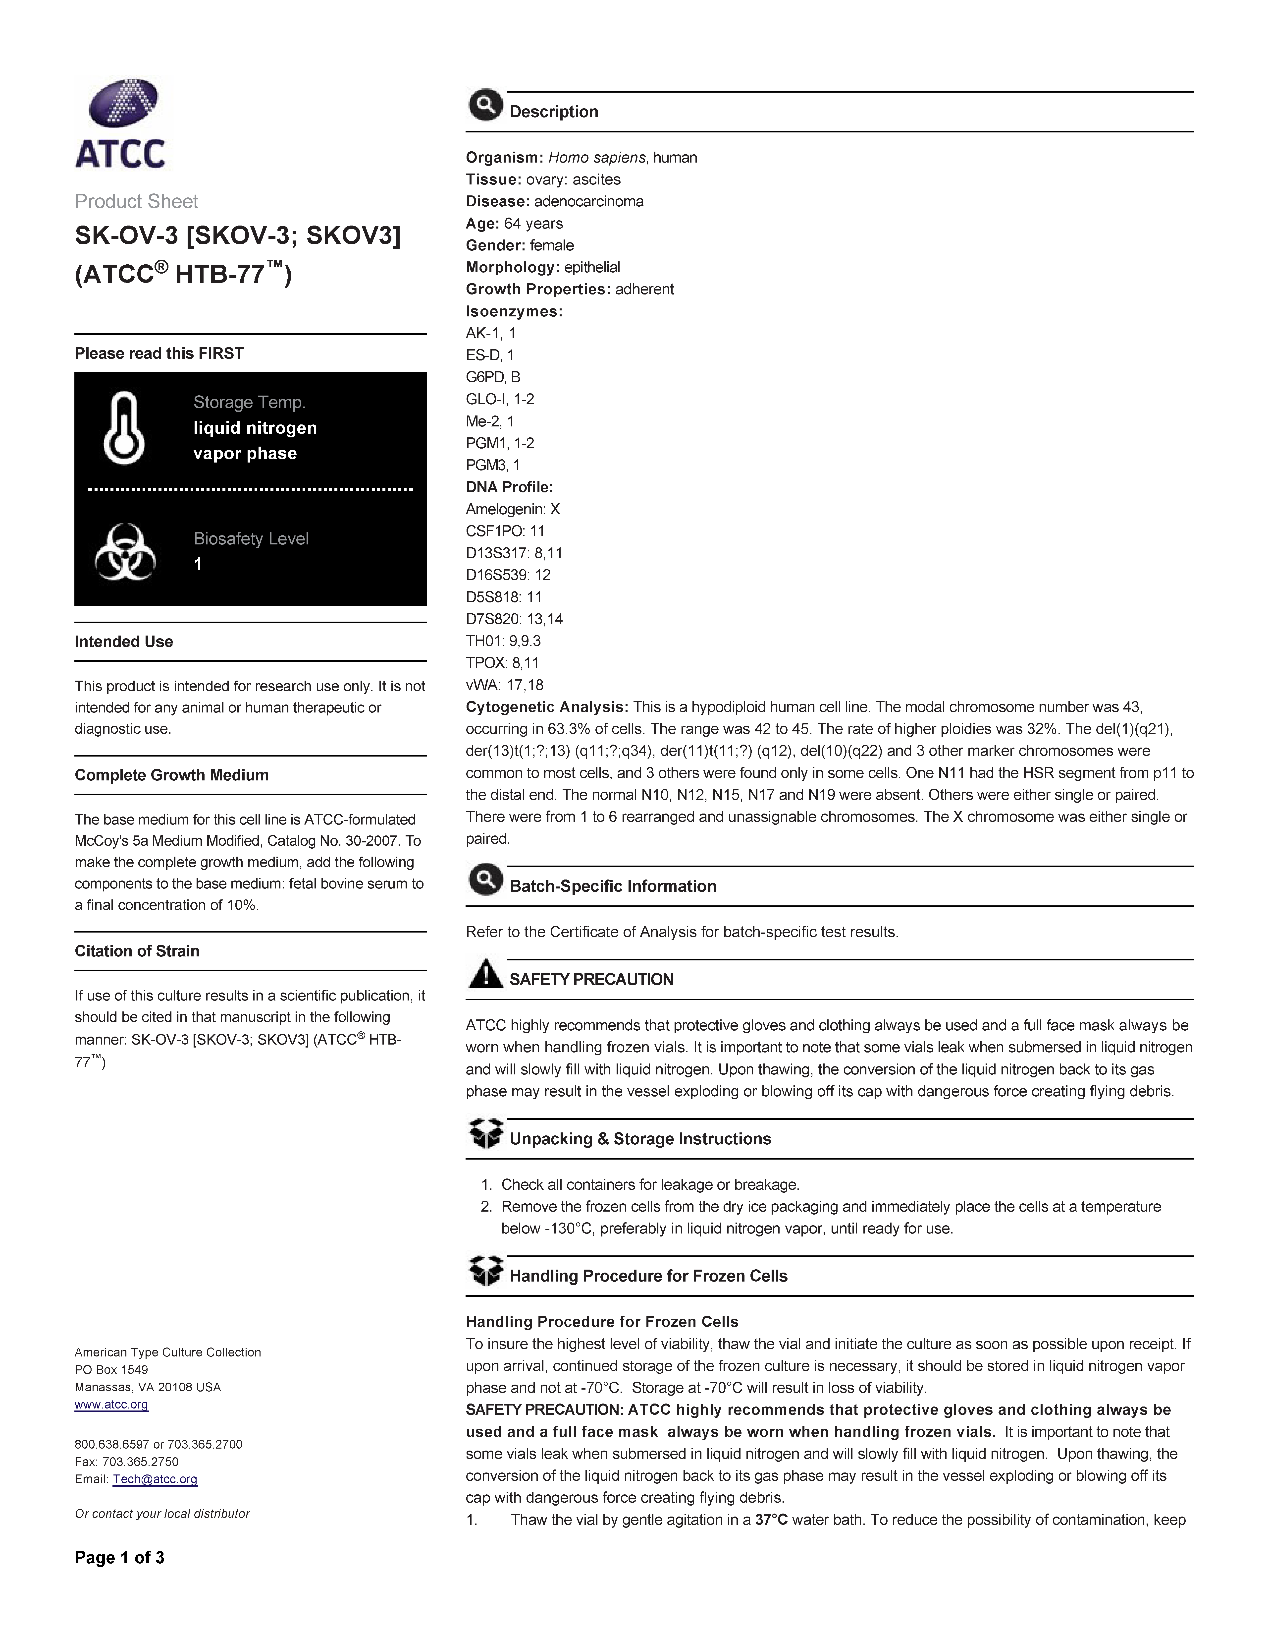


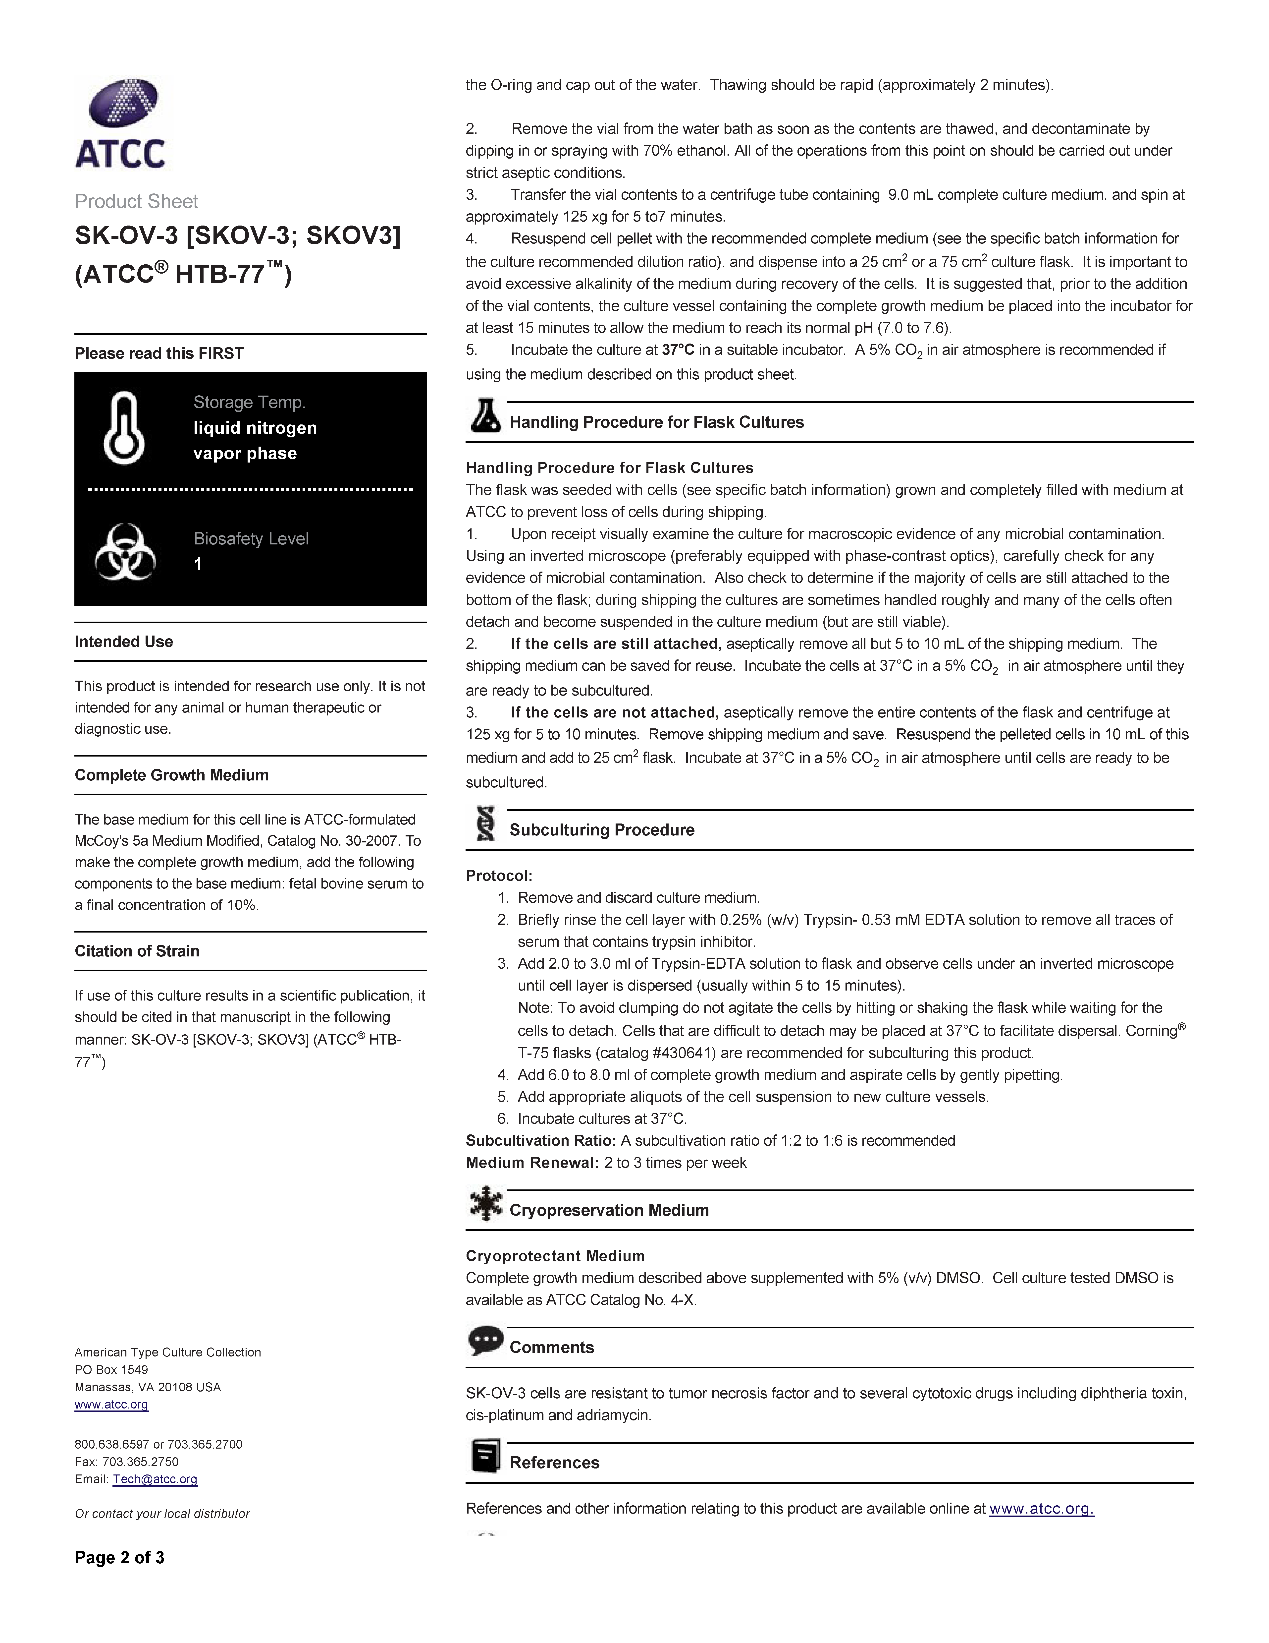

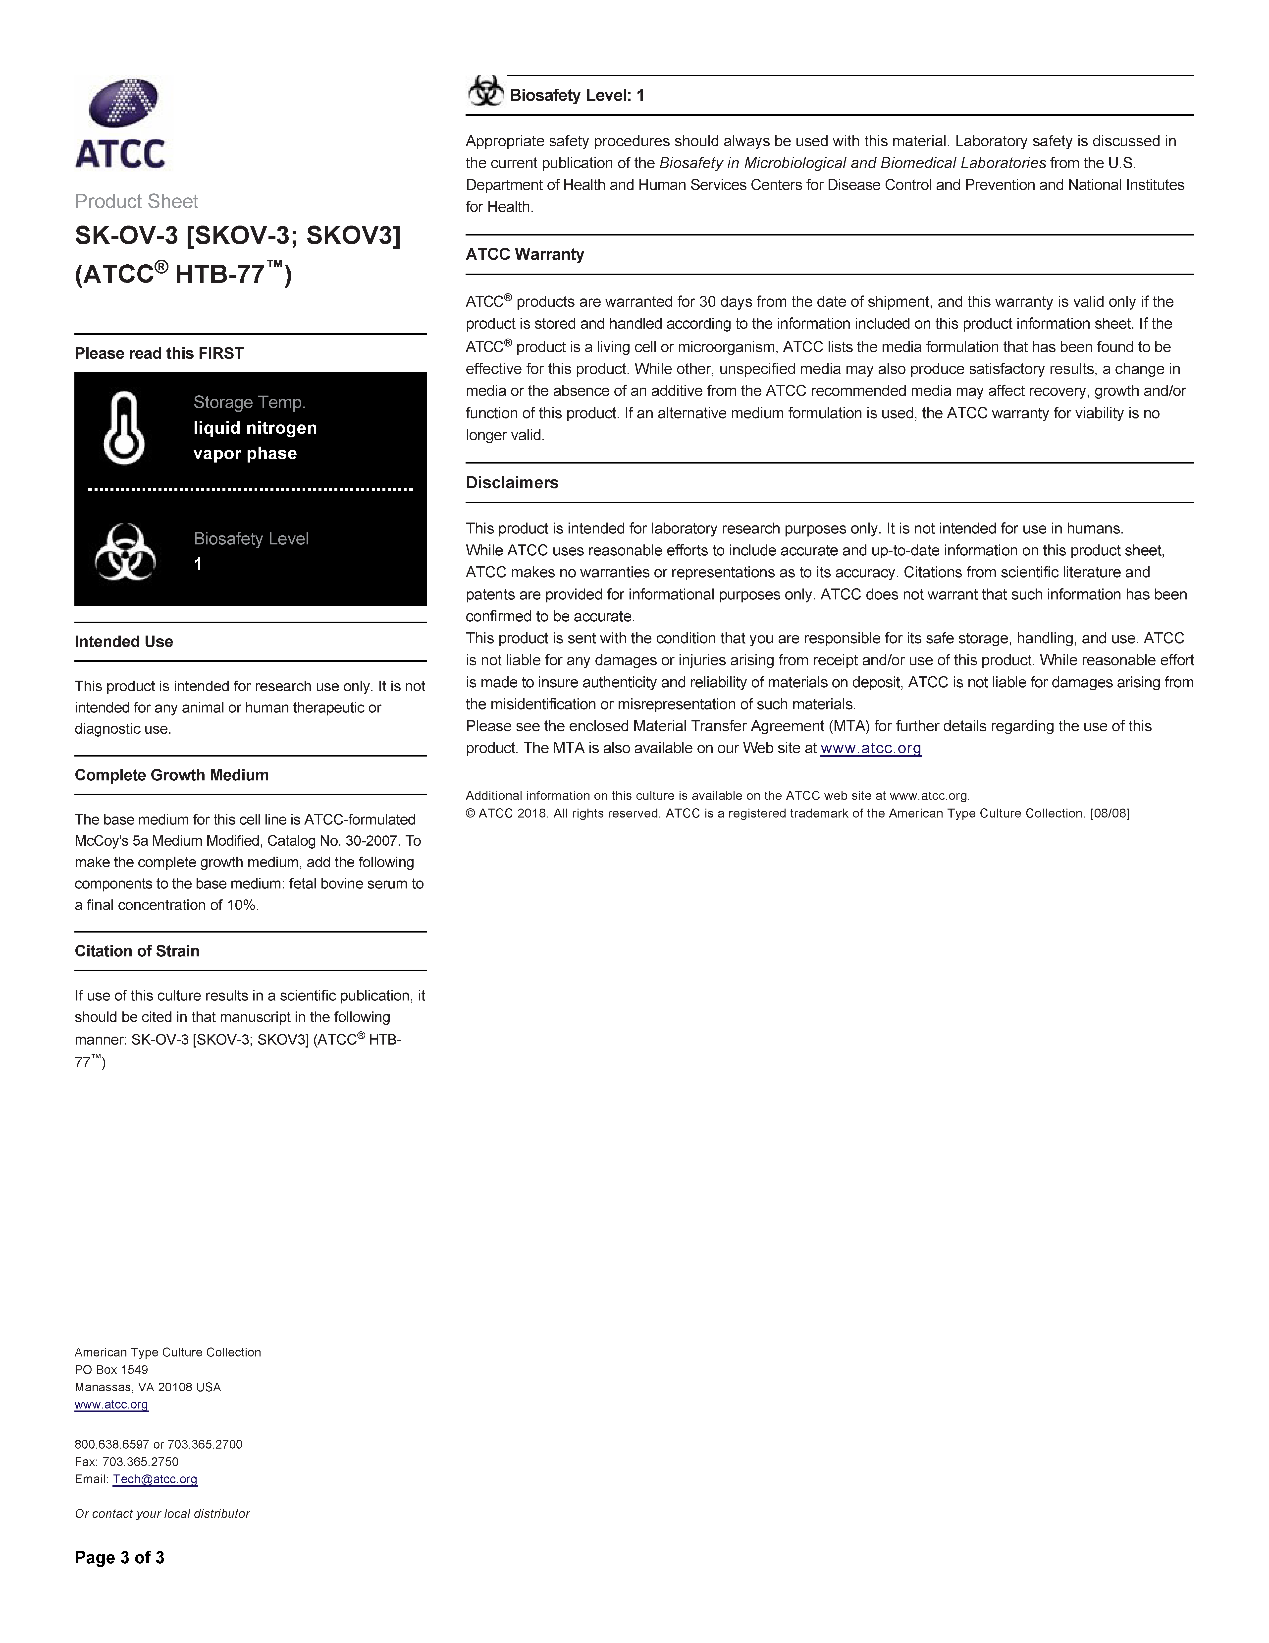


**Supplemental File11:** the details of OVCAR-3 cells


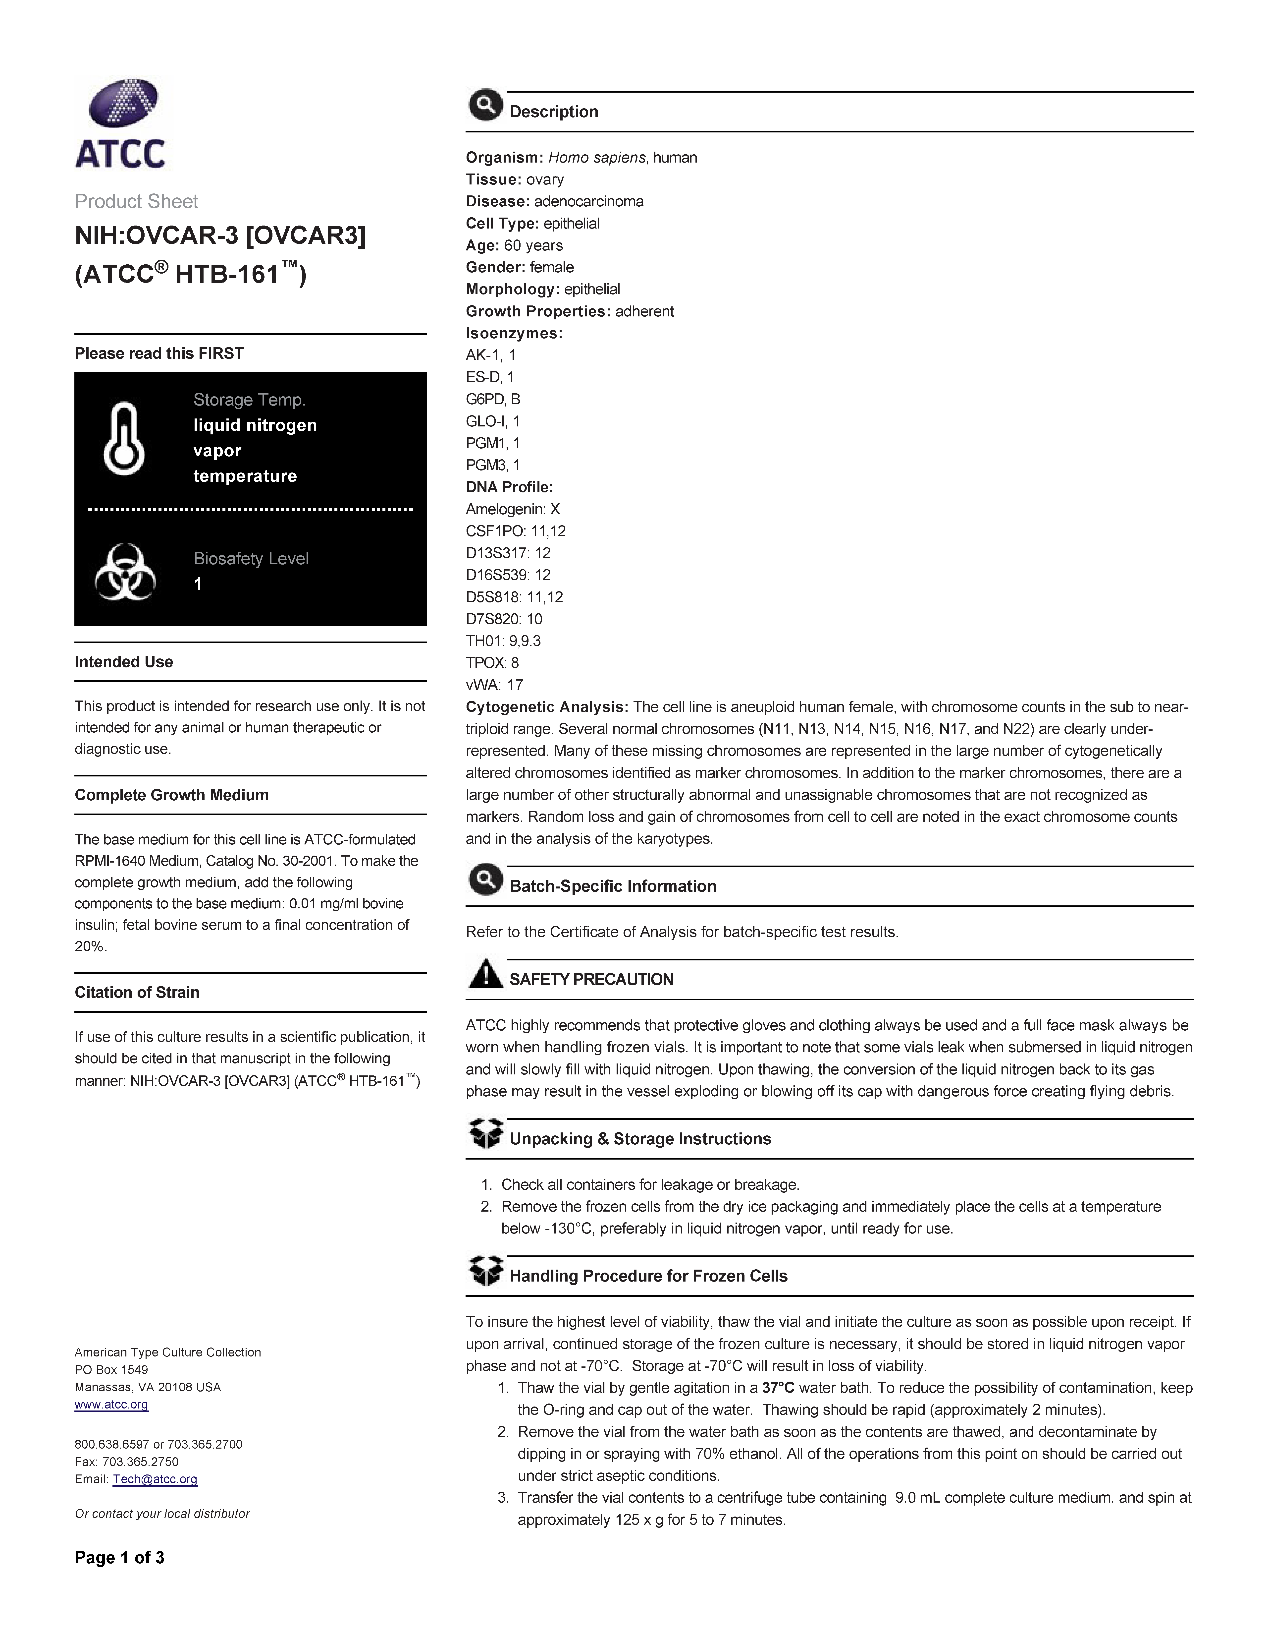


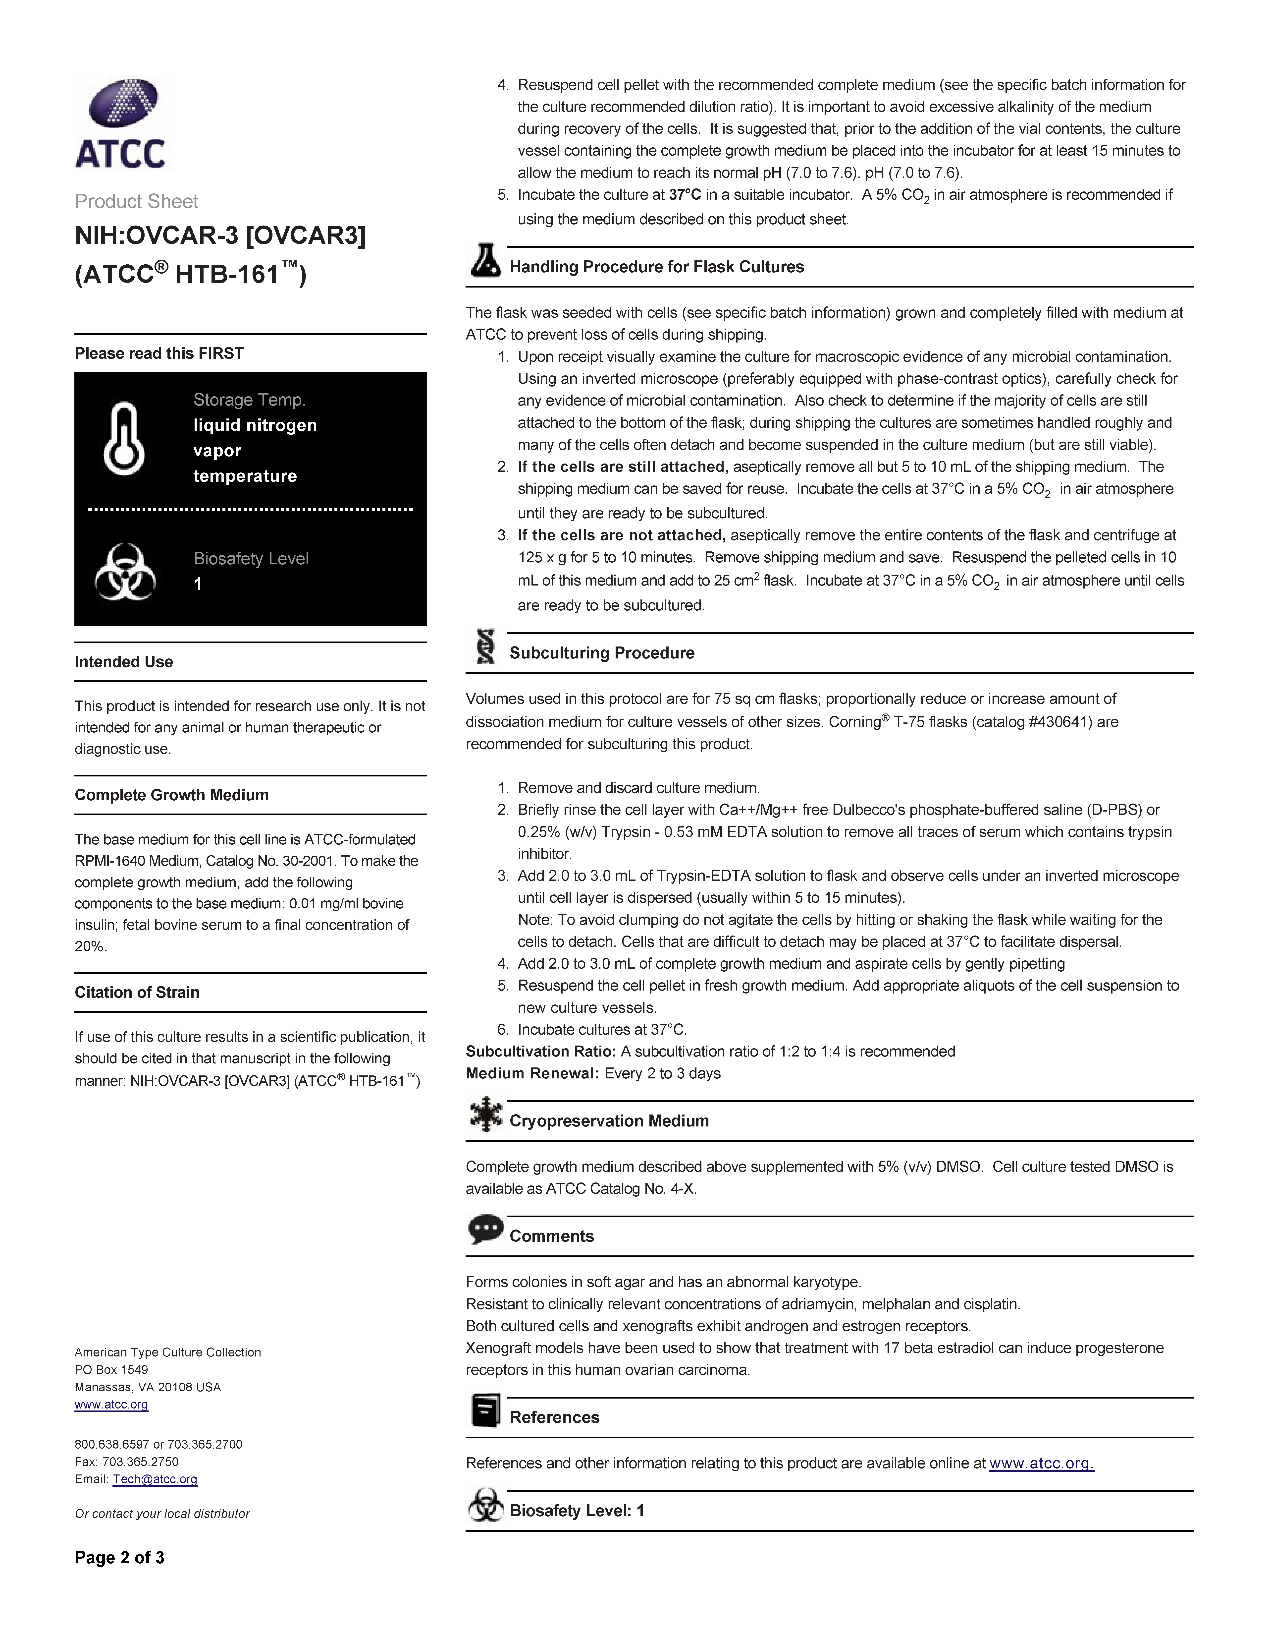

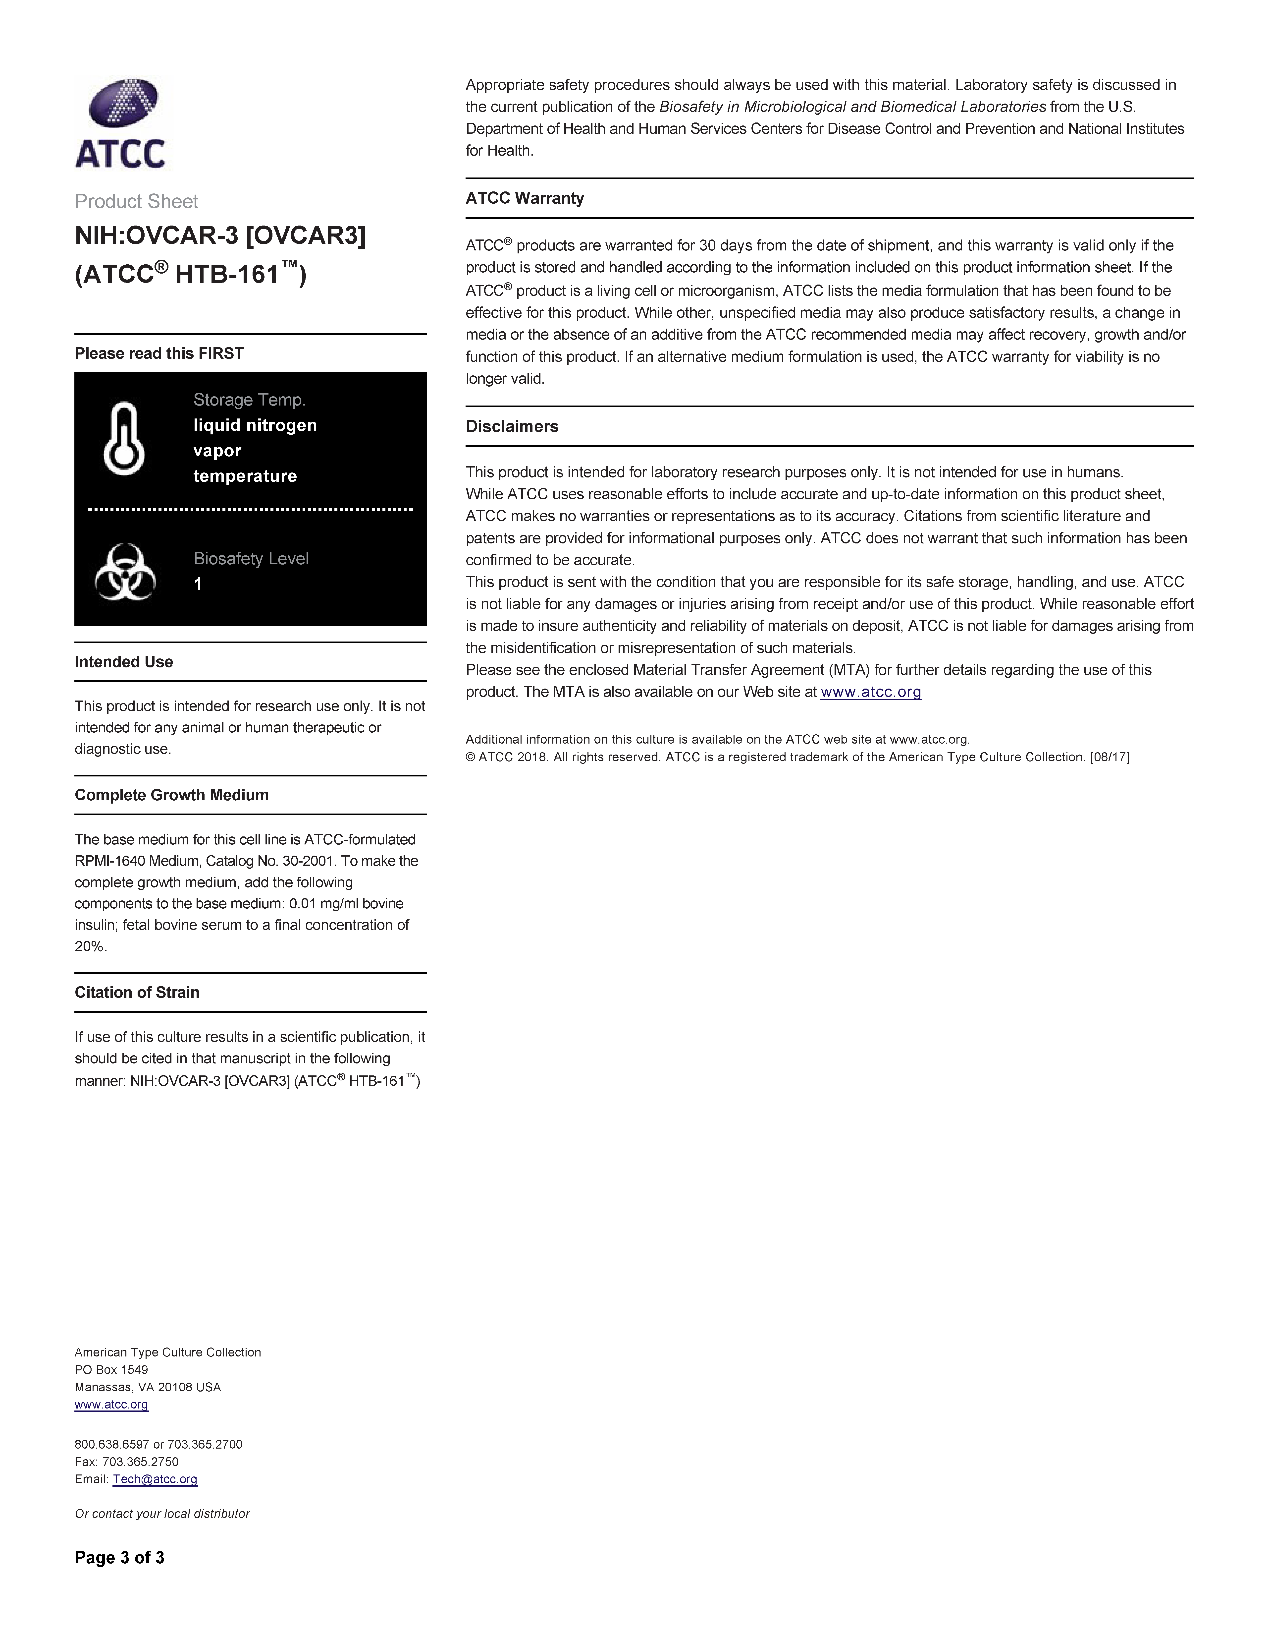


**Supplemental File12:** the details of CAOV-3 cells


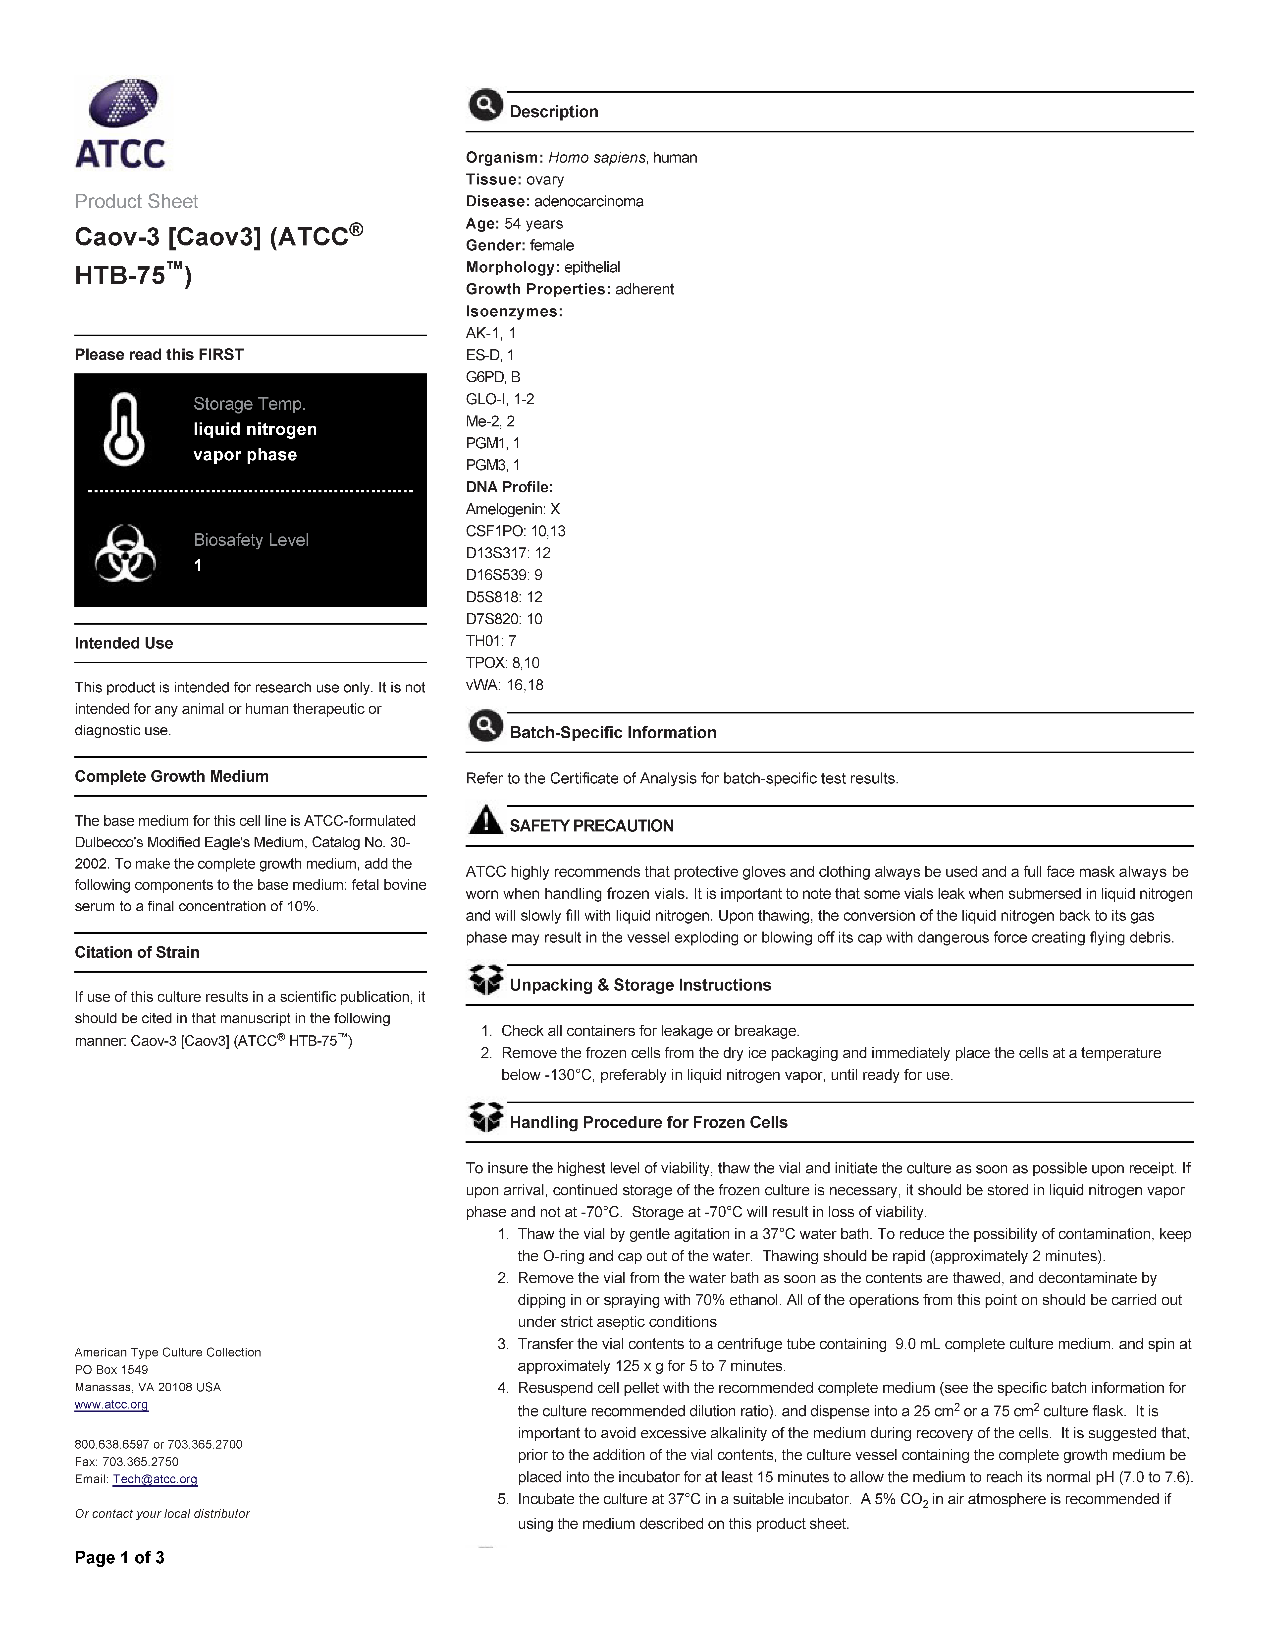

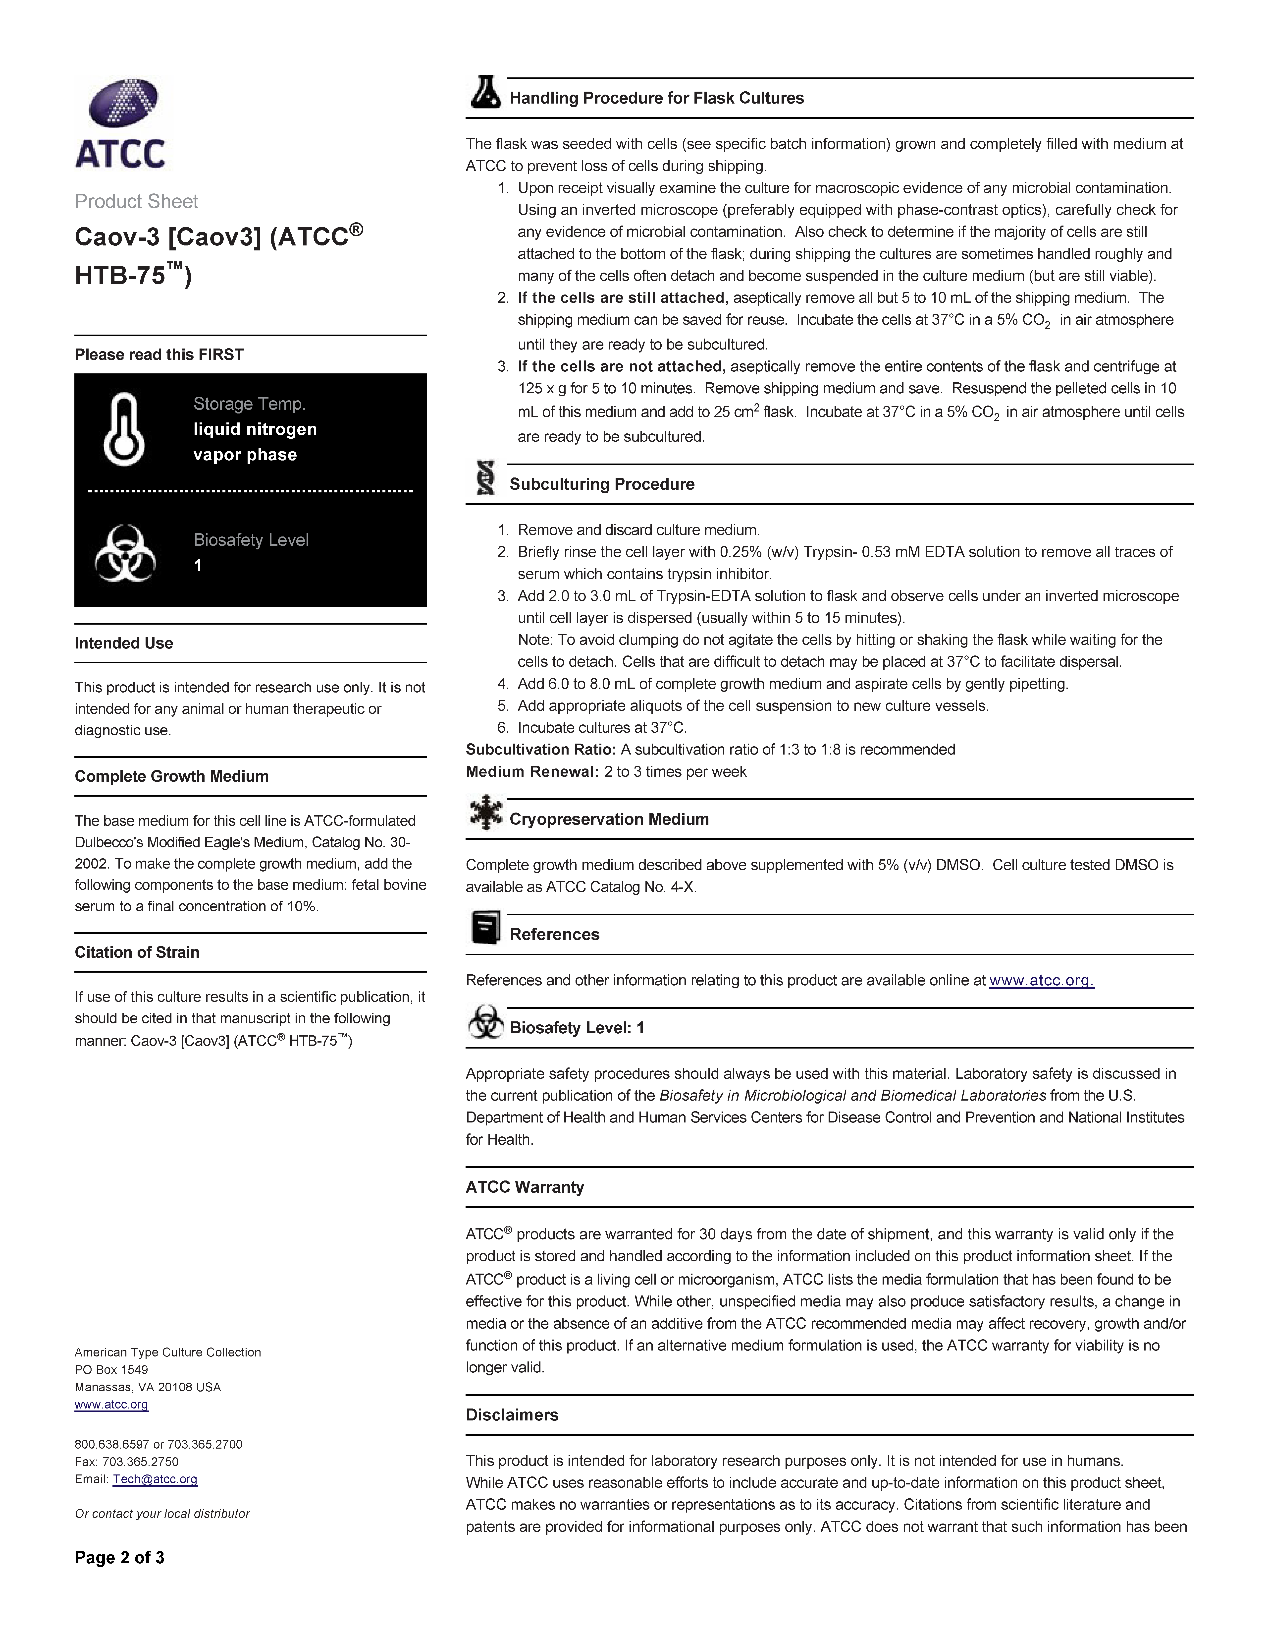

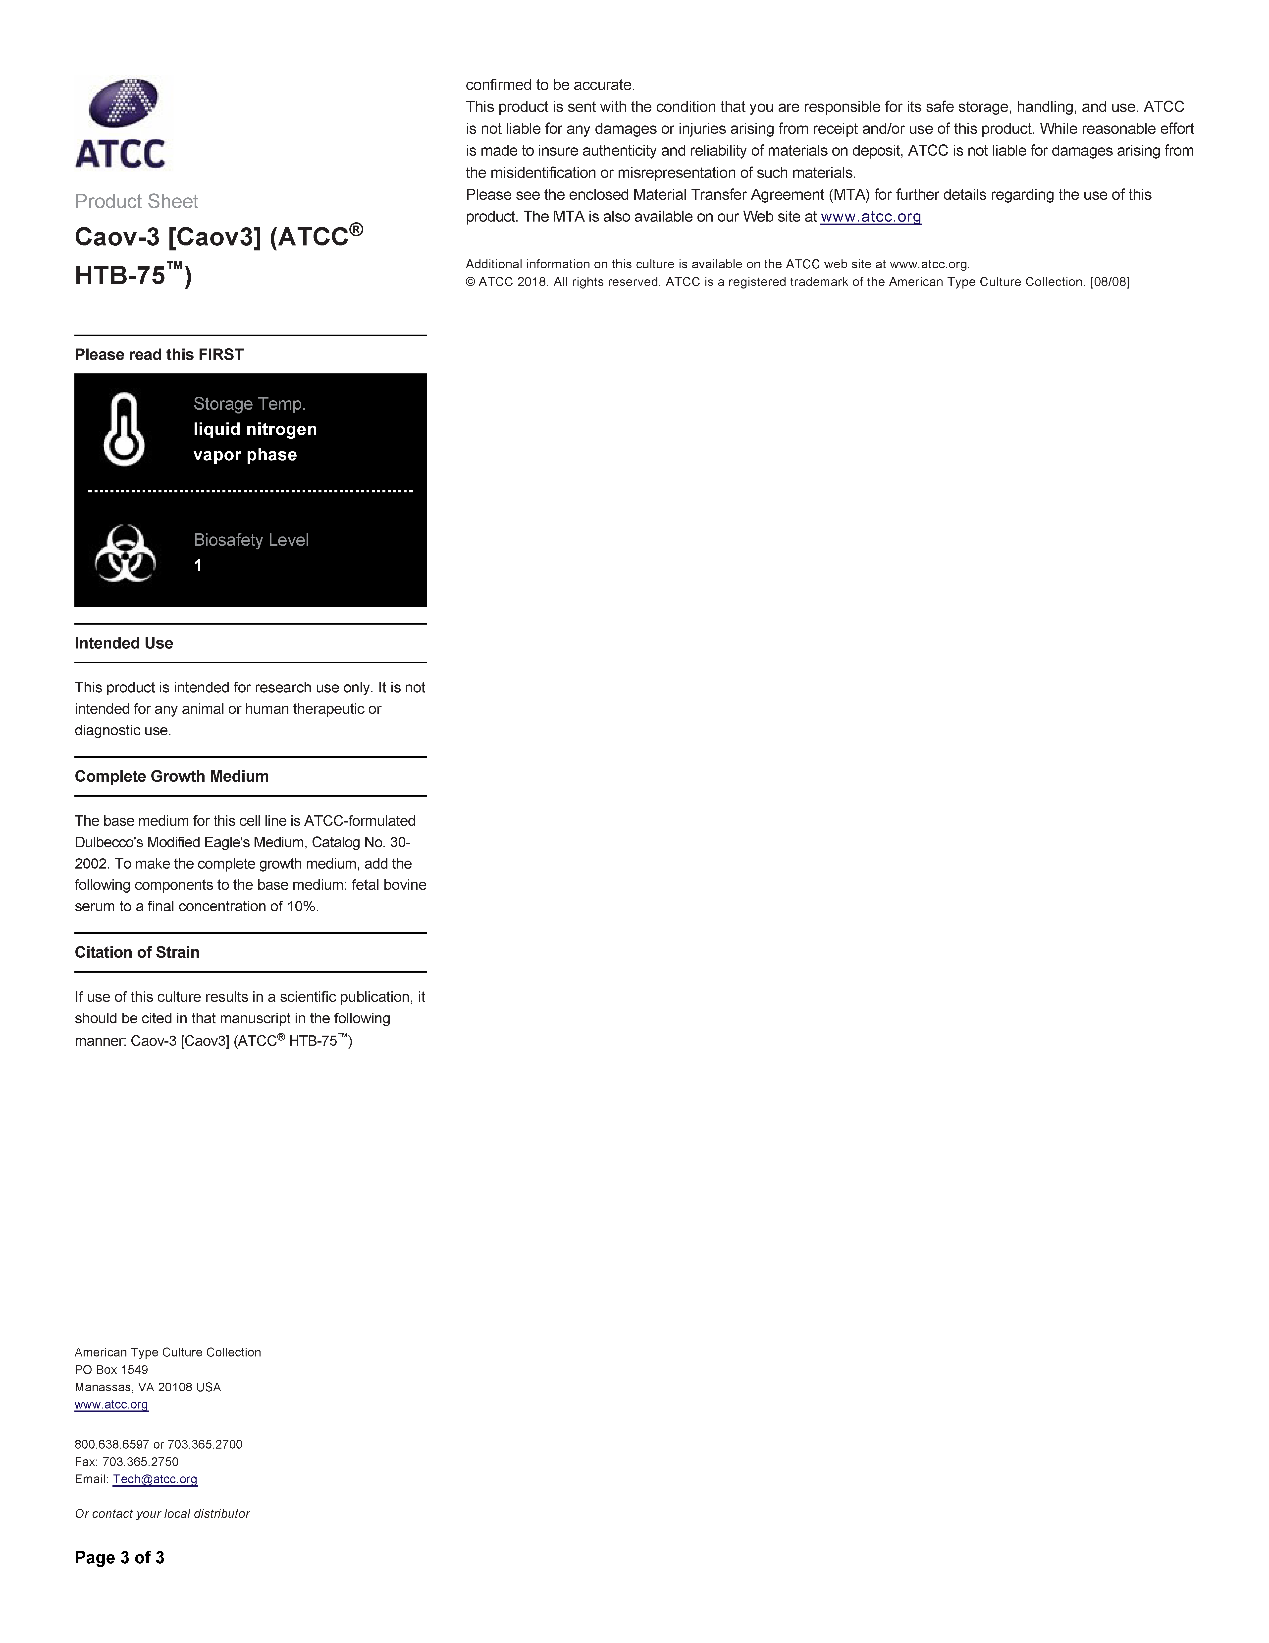

Supplement: Supplementary file 1 [file get_supplementary_file.php]
